# Supplementary material
Source: PubMed Central journal article supplement (PMC10154176)
Supplement: NIHMS1891782-supplement-SI.pdf [file NIHMS1891782-supplement-SI.pdf]

## SUPPORTING INFORMATION

Gelatin-based Microribbon Hydrogels Support Robust MSC Osteogenesis across a  
Broad Range of Stiffness

Bogdan Conrad <sup>a</sup>, Camila Hayashi <sup>b</sup>, Fan Yang <sup>c, \*</sup>

<sup>a</sup> Program of Stem Cell Biology and Regenerative Medicine, Stanford University

300 Pasteur Dr., Edward Building Room 114, Stanford, CA94305

Telephone: (952) 454-0067

Email: [bconrad4@stanford.edu](mailto:bconrad4@stanford.edu)

<sup>b</sup> Department of Chemical Engineering, Stanford University

Shriram Center, Room 129, Stanford, CA94305

Telephone: (310) 779-1795

Email: [camilah@stanford.edu](mailto:camilah@stanford.edu)

<sup>c, \*</sup> Department of Orthopaedic Surgery

Department of Bioengineering, Stanford University

300 Pasteur Dr., Edward Building Room 114, Stanford, CA94305

Telephone: (650) 725-7128

Fax: (650) 723-9370

Email: [fanyang@stanford.edu](mailto:fanyang@stanford.edu)

Pages: 6

Figures: 5

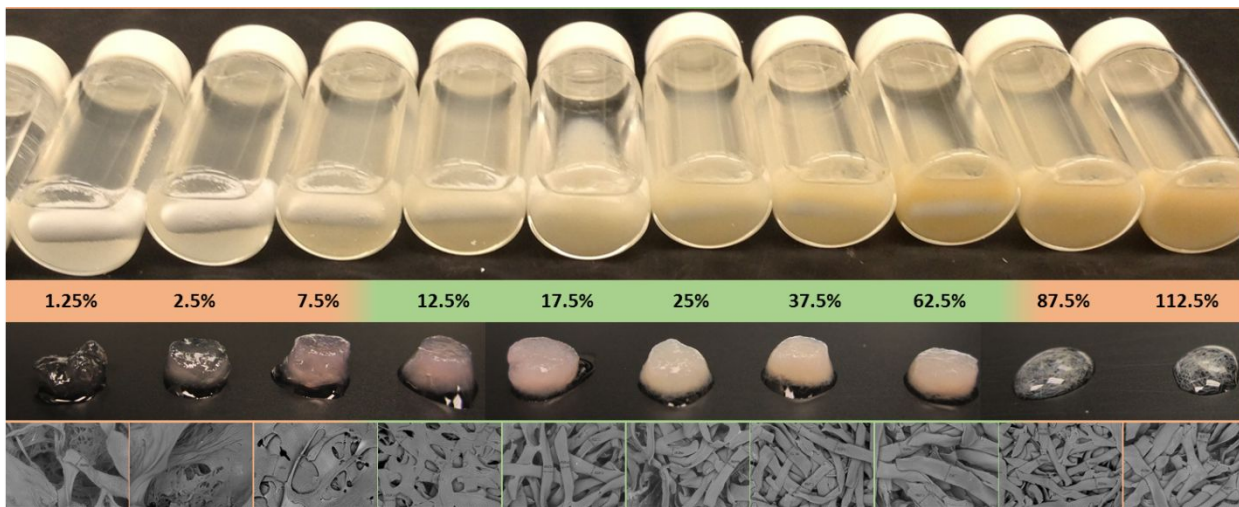

**Figure S1.** Determine the maximal stiffness range of  $\mu$ RBs that can be formed while still supporting intercrosslinking to form 3D macroporous scaffolds. Increasing crosslinker glutaraldehyde (GTA) concentration (1.25% - 112.5%) led to noticeable changes in color of the products. GTA concentration of 1.25% to 7.5% led to excessive swelling and form hydrogels rather than macroporous scaffolds. GTA concentration of 12.5% and above support  $\mu$ RB formation. GTA concentration of 87.5% and above led to  $\mu$ RBs with high stiffnesses with poor intercrosslinking efficiency and phase separation. Gross morphology and SEM of  $\mu$ RB scaffold showed maximal range of GTA concentration that support formation of 3D macroporous  $\mu$ RB scaffolds is between 12.5% to 62.5%.

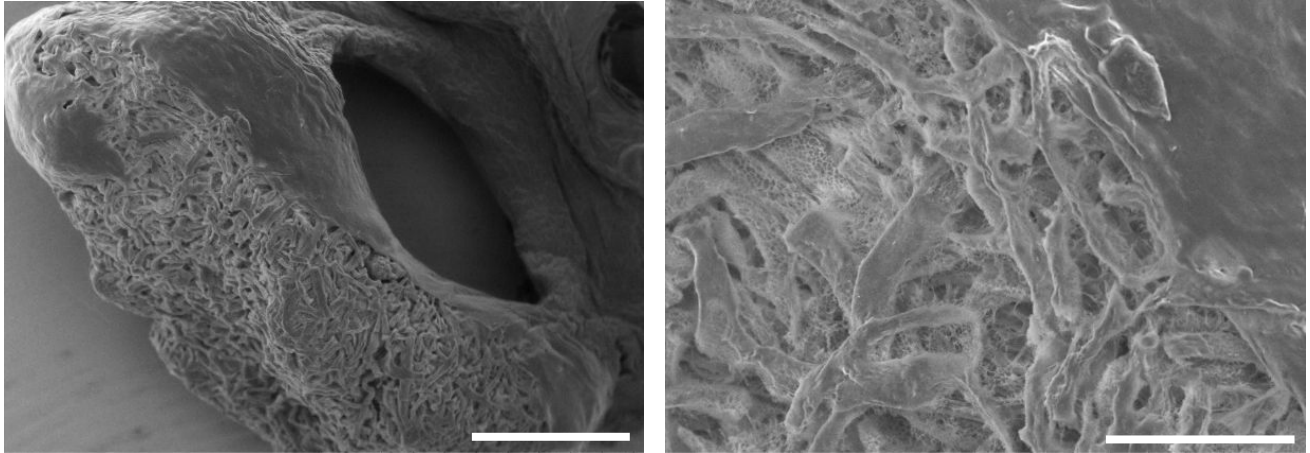

**Figure S2.** SEM image of cell-laden microribbon scaffolds on day 31 using microribbons with intermediate stiffness. Scale bar in low magnification image: 2 mm; Scale bar in high magnification image: 250  $\mu\text{m}$ .

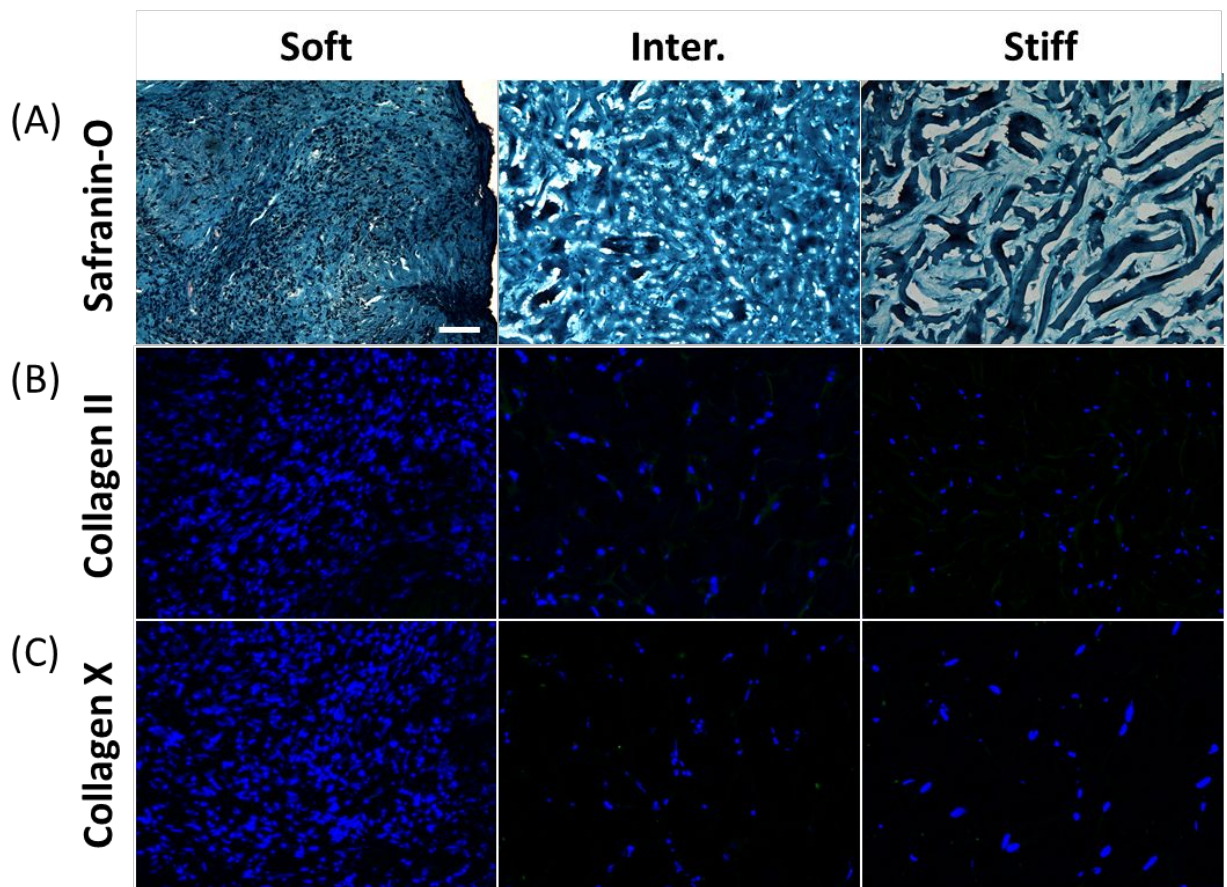

**Figure S3.** Staining of glycosaminoglycans and collagens II and X showed absence of cartilage marker expression. These results suggest MSC encapsulated in microribbon scaffolds with all three stiffnesses underwent intramembranous ossification, not endochondral ossification. (A) Safranin-O, (B) type II collagen, and (C) type X collagen. Blue: cell nuclei; Positive immunostainings of collagen should be green, which is absent; Scale bar: 200  $\mu\text{m}$ .

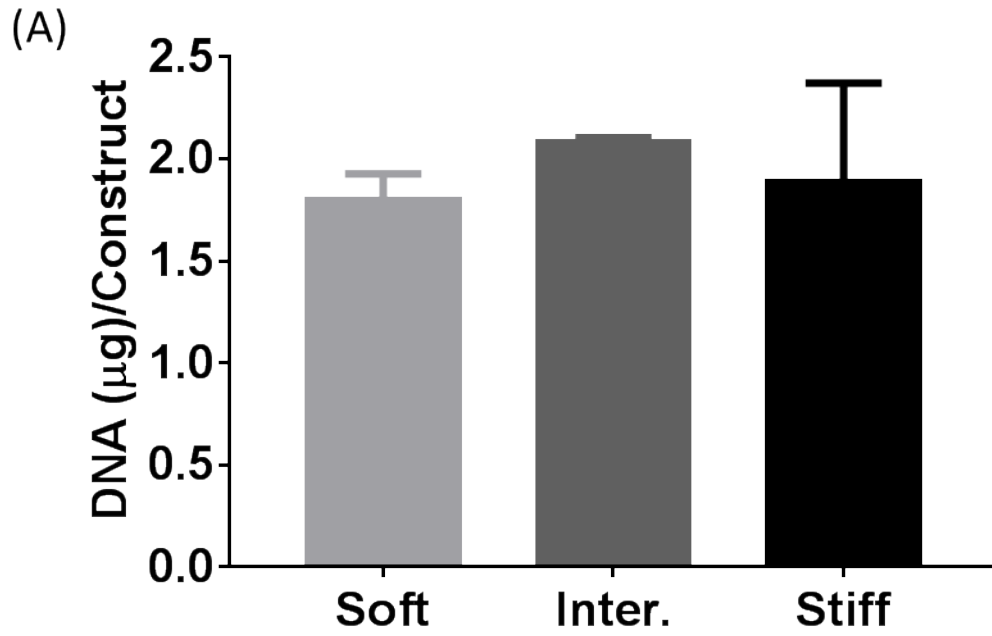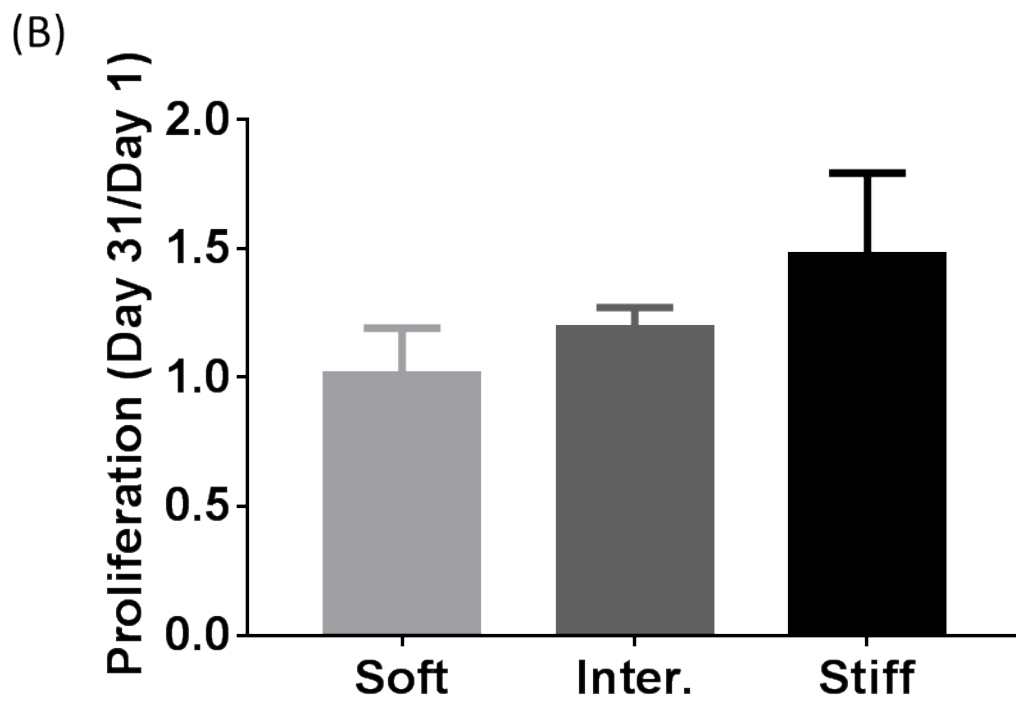

**Figure S4.**  $\mu$ RBs supported high cell viability across all stiffnesses. (A) Gelatin  $\mu$ RBs scaffolds showed comparable numbers of cells across all three stiffnesses, (B) Fold of cell proliferation at day 31 measured by picogreen assay.

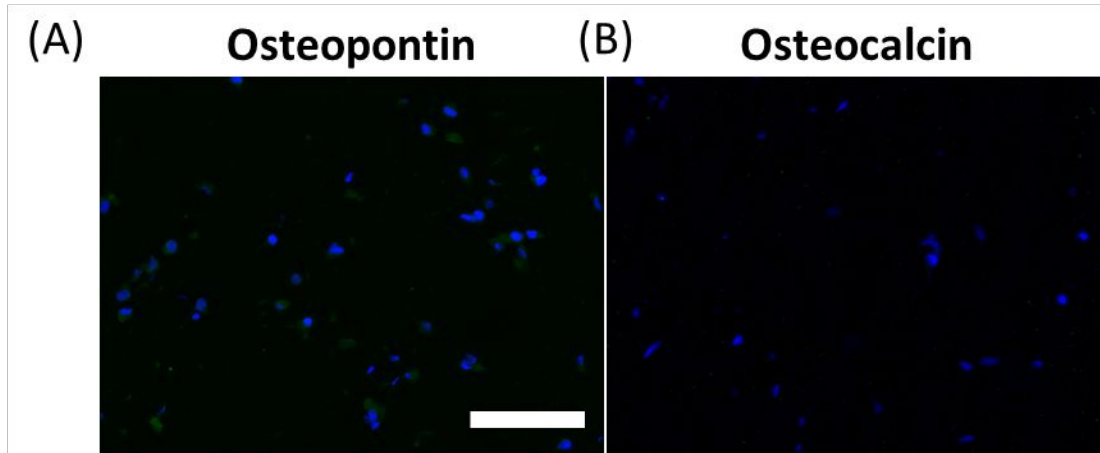

**Figure S5.** Immunostaining for (A) osteopontin and (B) osteocalcin for MSC seeded- $\mu$ RB scaffolds with HA on day 1. No bone markers were observed at day 1. Green: osteopontin/osteocalcin, blue: nuclei; Scale bar: 100  $\mu$ m.
